# Supplementary material
Source: PubMed Central journal article supplement (PMC3876819)
Supplement: supp_mol.113.086967_SupplementarydataYFMP-final.pdf [file supp_mol.113.086967_SupplementarydataYFMP-final.pdf]

**HIV protease inhibitors interact with ABCC4/MRP4: a basis for unanticipated enhanced cytotoxicity**

Yu Fukuda, Kazumasa Takenaka, Alex Sparreboom, Satish B. Cheepala, Chung-Pu Wu, Sean Ekins, Suresh V. Ambudkar, John D. Schuetz

***Supplementary data***

**Methods**

**ATPase activity measurement**

The assay measured the amount of P<sub>i</sub> released over 20 min at 37 °C in the ATPase assay buffer (50 mM MES-Tris, pH 6.8, 50 mM KCl, 5 mM sodium azide, 2 mM EGTA, 2 mM dithiothreitol, and 10 mM MgCl<sub>2</sub>). The assay was carried out under basal conditions or in the presence of putative substrates or modulators. The reaction was initiated with 5 mM ATP and quenched with SDS (2.5% final concentration). The amount of P<sub>i</sub> released was measured using a colorimetric assay.

**PMEA efflux in the presence of NFV**

Wild-type or ABCC4/Mrp4 knockout MEFs were washed and incubated in ATP-depleting medium (DMEM without glucose, L-glutamine, sodium pyruvate (Cellgro, Manassas, VA) supplemented with 10 mM sodium azide and 10 mM 2-deoxy-glucose) for 30 min. Medium was then removed, and cells were incubated

## **Molecular Pharmacology**

with fresh ATP-depleting medium containing 10  $\mu\text{M}$  Bis(POM)-PMEA (with a trace amount of [ $^3\text{H}$ ]Bis(POM)-PMEA) for 30 min to allow intracellular accumulation of PMEAs. The cells were then washed twice with cold PBS and incubated in warm transport medium for the indicated duration in the absence or presence of 50  $\mu\text{M}$  NFV. PMEAs efflux was measured by monitoring the amount of radioactivity both in the media and in the cells by scintillation counting.

### **Bis(POM)-PMEA and RTV uptake and proliferation assay**

Saos2 or Hek293 cells containing either vector alone or MRP4 were incubated with Bis(POM)-PMEA (with a trace amount of [ $^3\text{H}$ ]Bis(POM)-PMEA) at a final concentration of 10  $\mu\text{M}$  or with RTV (with a trace amount of [ $^3\text{H}$ ]-RTV) at 0.5  $\mu\text{M}$  or 2  $\mu\text{M}$  for 3 hr. The medium was removed, and the cells washed extensively with cold PBS. Cells were then lysed with 0.5 M NaOH, and the amount of radioactivity in the lysate was measured by scintillation counting. Intracellular PMEAs levels were normalized to the protein concentration in the lysate as measured by Bradford assay.

Cell proliferation assay was performed as described in the main text. In brief, Hek293 cells were cultured overnight in a 96 well plate, treated with various concentrations of Bis(POM)-PMEA in the presence or absence of 60  $\mu\text{M}$  RTV for 6 hr, followed by an incubation in drug-free MTT medium for 3 days.

## Molecular Pharmacology

**Supplementary Table S1.** Input details for pharmacophore construction

| Compound   | MaxOmitFeat | Principal |
|------------|-------------|-----------|
| Ritonavir  | 0           | 1         |
| Nelfinavir | 0           | 2         |
| Amprenavir | 0           | 0         |
| Indinavir  | 0           | 0         |
| Saquinavir | 0           | 0         |

## Molecular Pharmacology

**Supplementary Table S2.** Training set for diverse MRP4 models

| Compound     | Activ | Principal |
|--------------|-------|-----------|
| Dipyridamole | 1     | 2         |
| Quercetin    | 1     | 2         |
| MK-571       | 2     | 1         |
| Indomethacin | 5     | 1         |
| Sulindac     | 2     | 1         |
| Losartan     | 10    | 1         |
| Sildenafil   | 20    | 0         |
| AEBSF        | 750   | 0         |
| Celecoxib    | 35    | 0         |
| Probenecid   | 100   | 0         |

## Molecular Pharmacology

### Supplementary Table S3. MRP4 model 1

| FitValue | TestSubstance_ChemicalName |
|----------|----------------------------|
| 2.34022  | Methyl hesperidin          |
| 2.05303  | Nelfinavir mesylate        |
| 1.81393  | Digitoxin                  |
| 1.57506  | Hesperidin                 |
| 1.08746  | Chromomycin A3             |
| 0.894553 | Methyldigoxin              |
| 0.758604 | Pepstatin                  |
| 0.49864  | Echinacoside               |
| 0.368538 | Lanatoside A               |
| 0.254237 | Vancomycin hydrochloride   |
| 0.200317 | Deslanoside                |
| 0.127627 | Lanatoside B               |

## Molecular Pharmacology

### Supplementary Table S4. MRP4 model 2

| FitValue | TestSubstance_ChemicalName |
|----------|----------------------------|
| 7.99848  | Nelfinavir mesylate        |
| 4.52654  | Atazanavir                 |
| 2.79973  | Ioxaglic acid              |
| 2.50273  | Mepartricin                |
| 2.4375   | Deslanoside                |
| 2.42177  | Nicofuranose               |
| 1.80846  | Bisbutiamine               |
| 1.75545  | Virginiamycin S1           |
| 1.50905  | Triptorelin pamoate        |
| 1.30721  | Leucomycin tartrate        |
| 0.876732 | Josamycin                  |

## Supplementary figure S1

### Structures of HIV protease inhibitors

| Molecule                                                                                                                                                                                                                 | Name             | MWT    |
|--------------------------------------------------------------------------------------------------------------------------------------------------------------------------------------------------------------------------|------------------|--------|
| The chemical structure of Amprenavir (APV) features a central chiral center with a hydroxyl group, a benzyl group, and a side chain containing a morpholine ring, a hydroxyl group, and a p-aminophenyl group.           | Amprenavir (APV) | 505.64 |
| The chemical structure of Saquinavir (SQV) is a complex molecule with a central chiral center, a hydroxyl group, a benzyl group, and a side chain containing a piperidine ring, a hydroxyl group, and a piperidine ring. | Saquinavir (SQV) | 670.90 |
| The chemical structure of Nelfinavir (NFV) features a central chiral center with a hydroxyl group, a benzyl group, and a side chain containing a piperidine ring, a hydroxyl group, and a piperidine ring.               | Nelfinavir (NFV) | 663.90 |
| The chemical structure of Ritonavir (RTV) is a complex molecule with a central chiral center, a hydroxyl group, a benzyl group, and a side chain containing a piperidine ring, a hydroxyl group, and a piperidine ring.  | Ritonavir (RTV)  | 720.96 |
| The chemical structure of Indinavir (IDV) features a central chiral center with a hydroxyl group, a benzyl group, and a side chain containing a piperidine ring, a hydroxyl group, and a piperidine ring.                | Indinavir (IDV)  | 613.81 |

**S1 Structures of HIV protease inhibitors used in the study.**

## Supplementary figure S2

**A**

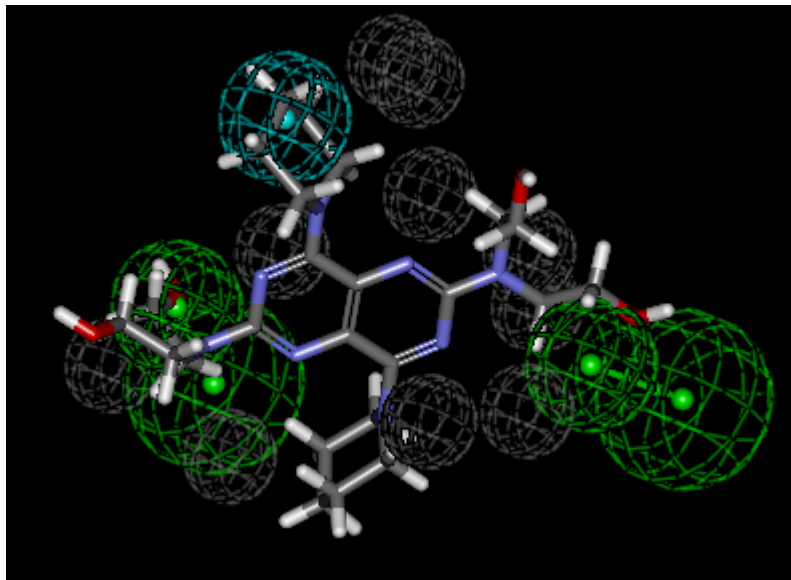

**B**

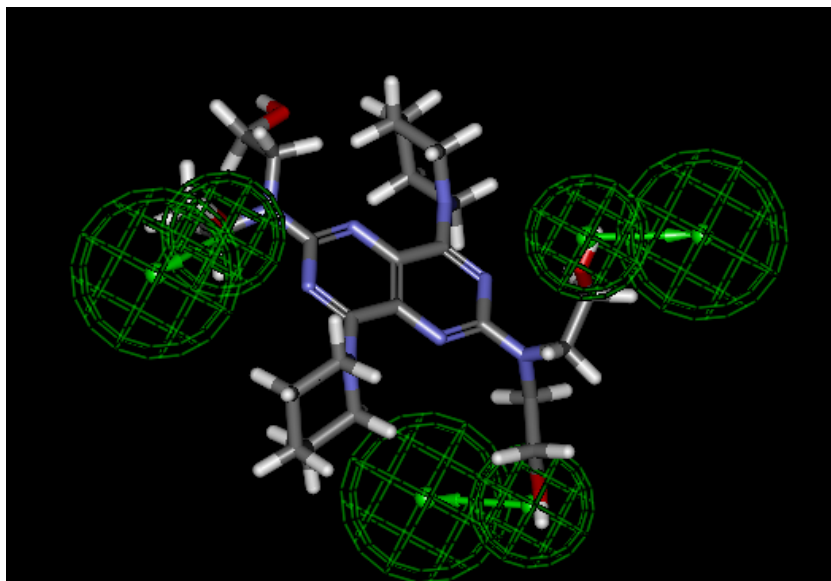

**S2 Inhibitor pharmacophores for MRP4.** (A) dipyrnidamole mapped to common features pharmacophore – green = hydrogen bond acceptor, cyan = hydrophobic, grey = excluded volumes (space to avoid). (B) Dipyrnidamole mapped to quantitative pharmacophore.



## Supplementary figure S3

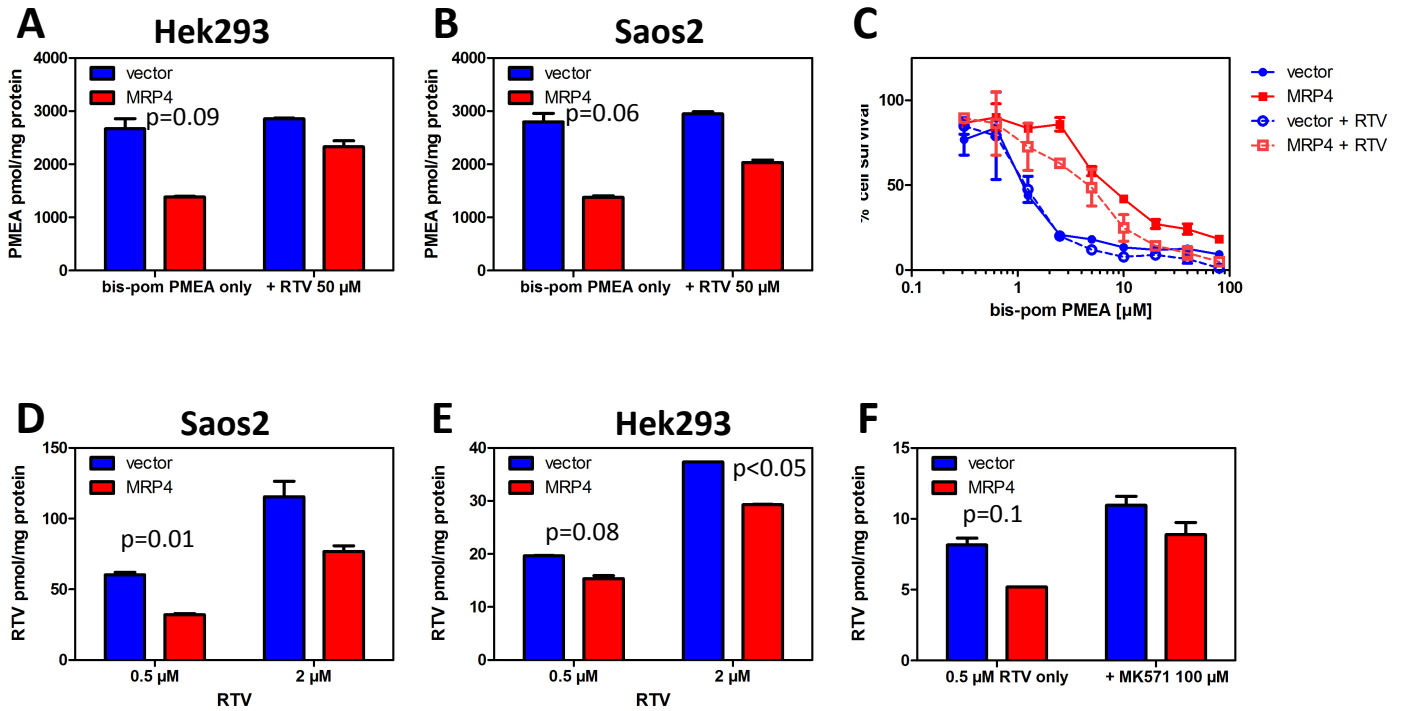

**S3 Ritonavir is a weak MRP4 inhibitor and substrate.** Bis-(POM) PMEA uptake was determined in (A) Hek293 or (B) Saos2 cells overexpressing either vector alone or MRP4 in the presence or absence of 50  $\mu$ M RTV. (C) Presence of 60  $\mu$ M RTV partially sensitized Hek293 cells overexpressing MRP4 to Bis-(POM) PMEA cytotoxicity. Uptake of radiolabeled RTV was reduced in (D) Saos2 or (E) Hek293 cells overexpressing MRP4. (F) MRP4 inhibitor, MK571, increases RTV accumulation in Hek293 cells overexpressing MRP4.
